# Supplementary material
Source: PubMed Central journal article supplement (PMC3065323)
Supplement: NIHMS189973-supplement-supplemental_data.pdf [file NIHMS189973-supplement-supplemental_data.pdf]

## Supplemental Data

### Hedgehog Signaling Is Dispensable for Adult Murine Hematopoietic Stem Cell Function and Hematopoiesis

Inga Hofmann Zhang, Elizabeth H. Stover, Dana E. Cullen, Junhao Mao, Kelly J. Morgan, Benjamin H. Lee, Michael G. Kharas, Peter G. Miller, Melanie G. Cornejo, Rachel Okabe, Scott A. Armstrong, Nico Ghilardi, Stephen Gould, Frederic J. de Sauvage, Andrew P. McMahon, and D. Gary Gilliland

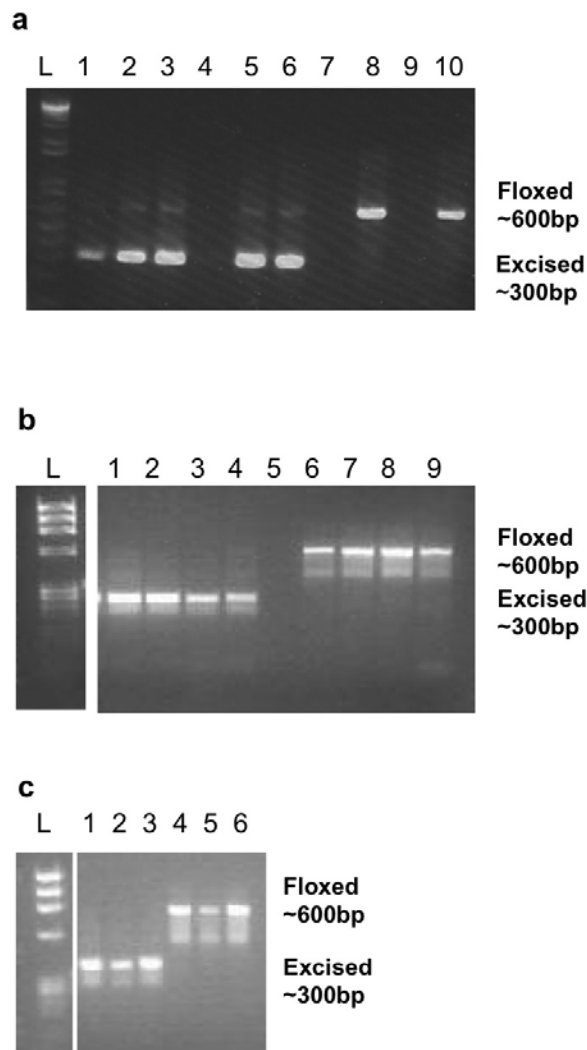

**Figure S1. Long-term adult hematopoiesis is sustained by *Smo* deficient hematopoietic cells**

**(a)** *Smo*<sup>Null</sup> or *Smo*<sup>WT</sup> mice (n=3-6 per group) were treated with ~25 µg/gram pIpC at 10 weeks of age. Complete *Smo* excision via 3-primer PCR reaction was observed 6 months after pIpC injection in the peripheral blood. L = molecular weight markers, Lanes 1-6 = *Smo*<sup>Null</sup> blood samples derived from individual animals showing an excised *Smo* allele as a 300bp product; Lane 7=H2O control; Lanes 8-10 = *Smo*<sup>WT</sup> samples showing the intact floxed *Smo* allele with a 600bp product. Lanes 4 and 9 had suboptimal amplification. **(b)** Comparable mouse experiment (n=10 for *Smo*<sup>Null</sup> and n=4 for *Smo*<sup>WT</sup>) as in **(a)**, showing persistence of the excised *Smo* allele in the bone marrow 18 months after i.p. injection of 600 µg (=25 µg/gram) pIpC. L = molecular weight markers, Lanes 1-4 = *Smo*<sup>Null</sup> samples, Lane 5 = H2O control, Lanes 6-9 = *Smo*<sup>WT</sup> samples. **(c)** Demonstration of *Smo* excision in a competitive bone marrow transplant experiment. Bone marrow derived from *Smo*<sup>Null</sup> or *Smo*<sup>WT</sup> mice was transplanted at various ratios (see Methods) together with a competitor wildtype bone marrow from B6.SJL F1 into lethally irradiated B6.SJL recipients (n=15 per group). Mice were treated with i.p. pIpC (25 µg/gram body weight) 3 weeks after transplantation. Peripheral blood DNA was analyzed 4 weeks after pIpC injection to confirm *Smo* excision. L = molecular weight markers, Lanes 1-3 = *Smo*<sup>Null</sup> samples, Lanes 4-6 = *Smo*<sup>WT</sup> samples.

**a**

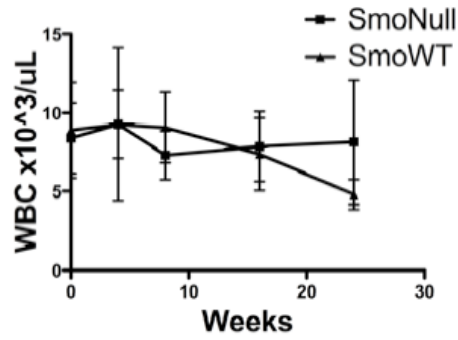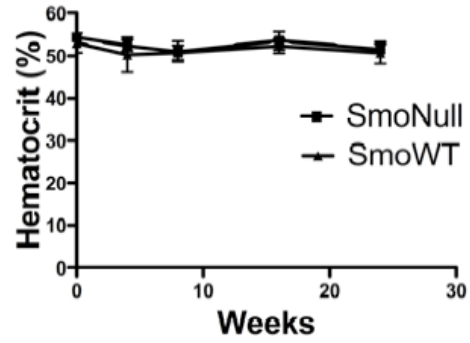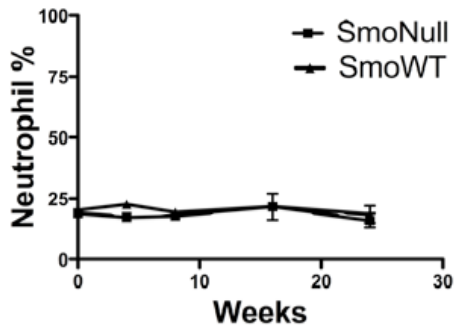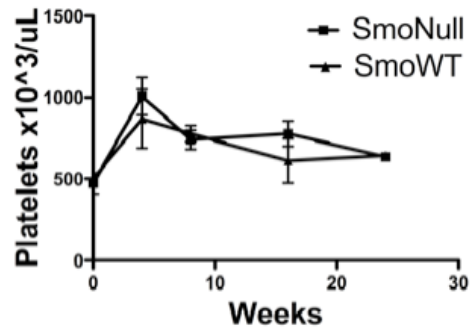

**b**

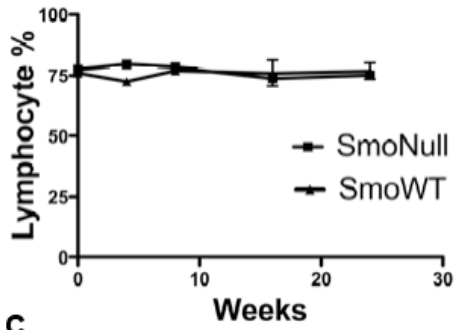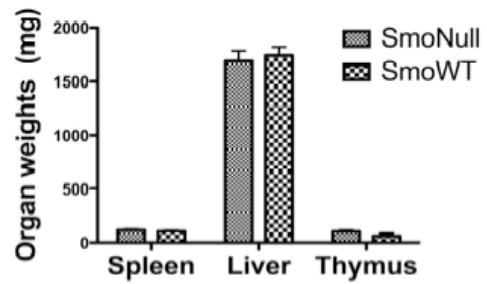

**c**

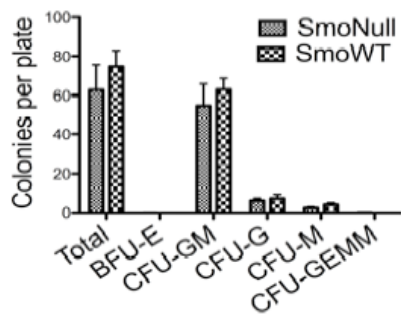

**Figure S2. Loss of *Smo* does not affect peripheral blood counts, organ weights, or CFU potential.**

(a) *Smo*<sup>Null</sup> or *Smo*<sup>WT</sup> mice (n=3-6 per group) were treated with 25 µg/gram pIpC by i.p. injection at 10 weeks of age. Peripheral blood counts were obtained at 4, 8, 18 and 24 weeks for analysis. No difference in WBC (top left), % neutrophil count (middle left), % lymphocyte count (bottom left), hematocrit (top right), or platelet count (lower right) was observed (p=0.1292-0.735, unpaired *t* test). Error bars represent s.d. (b) Same experiment as (a) demonstrating no effect on spleen, liver, and thymus weight at the end point analysis 6 months after pIpC injection (p=0.4480, 0.1823, and 0.7187, unpaired *t* test). Error bars represent s.e.m. (c) No difference in the CFU potential of *Smo*<sup>Null</sup> (n=10) vs *Smo*<sup>WT</sup> (n=4) mice 18 months after pIpC treatment (p=0.8393, unpaired *t* test). Error bars represent s.e.m.

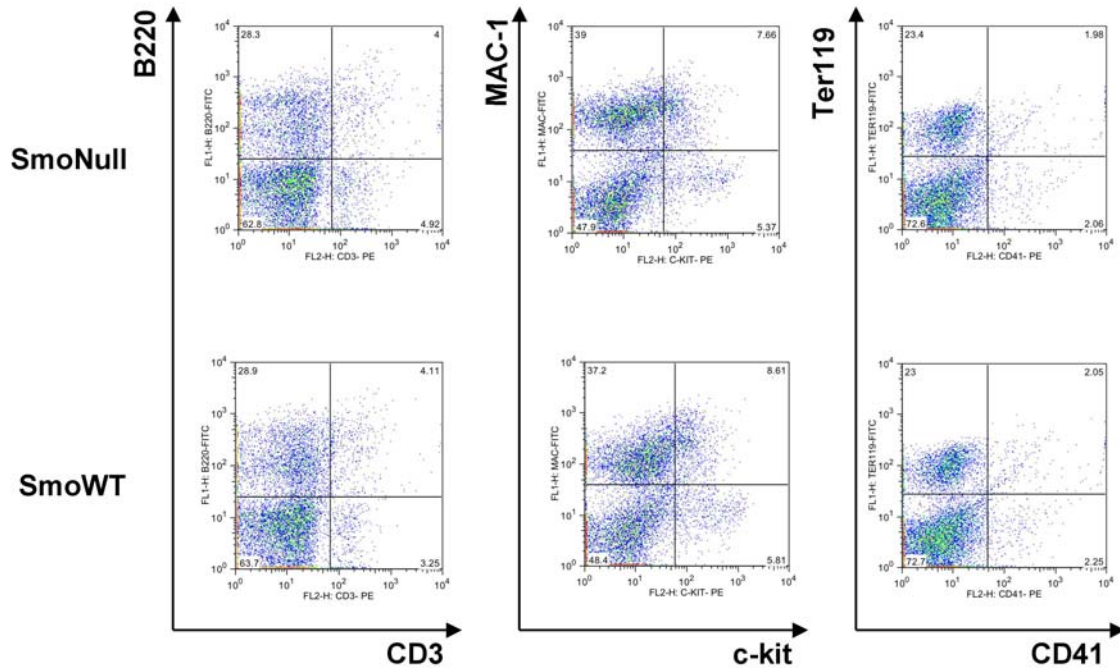

**Figure S3. Loss of *Smo* shows no effect on terminally differentiated cells.**

Same experiment as **Figure S1b**. Representative flow analysis panels are shown for *Smo*<sup>Null</sup> (top row) and *Smo*<sup>WT</sup> (bottom row) mice. Loss of *Smo* did not lead to any differences in lymphocytes as shown by CD3 positive T cells and B220 positive B cells (left); myeloid cells as shown by expression of Mac-1 and c-kit (middle); or Ter119 positive erythroid cells and CD41 positive megakaryocytes.
